# Supplementary material for: Cardiopulmonary coupling indices to assess weaning readiness from mechanical ventilation
Source: PubMed Central journal article supplement (PMC8346488; doi:10.1038/s41598-021-95282-2), 2021-08-06
Supplement: 41598_2021_95282_MOESM4_ESM.pdf [file 41598_2021_95282_MOESM4_ESM.pdf]

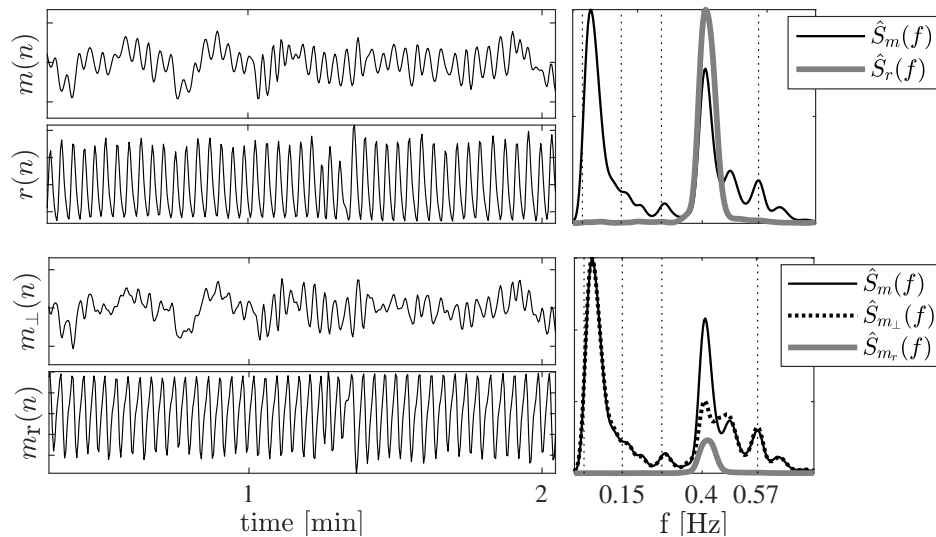

**Supplementary Figure 2.** Illustrative example of the OSP decomposition using the HRV and Respiratory signals. The three upper plots are the time evolution of the modulating signal,  $m(n)$ , the respiratory signal,  $r(n)$ , and their respective spectra on the upper-right side,  $\hat{S}_m(f)$  for  $m(n)$  and  $\hat{S}_r(f)$  for  $r(n)$ . The three plots below represent the OSP decomposition. The respiratory component of HRV,  $m_r(n)$ , is obtained projecting  $m(n)$  onto the respiratory subspace. The modulators of HRV unrelated to respiration are represented in the term  $m_{\perp}(n)$ . Their corresponding spectra are on the lower-right side.  $\hat{S}_{m_{\perp}}(f)$  corresponds to the spectra of  $m_{\perp}(n)$ , and  $\hat{S}_{m_r}(f)$  to the spectra of  $m_r(n)$ . For further information, see<sup>38</sup>.
